# Supplementary material for: Electronic Cigarette Use and Myocardial Infarction Among Adults in the US Population Assessment of Tobacco and Health
Source: PubMed Central journal article supplement — J Am Heart Assoc. 2019 Jun 5;8(12):e012317. doi: 10.1161/JAHA.119.012317 (PMC6645634; doi:10.1161/jaha.119.012317), 2019-06-05

# **SUPPLEMENTAL MATERIAL**

**Table S1. Myocardial Infarctions, tobacco use, clinical, and demographic variables.**

| Variables (at Wave 1)                         | E-cigarette Use at Wave 1 (Weighted percent) |              |              |              | P-value* |
|-----------------------------------------------|----------------------------------------------|--------------|--------------|--------------|----------|
|                                               | Never                                        | Former       | Some Day     | Every Day    |          |
| <b>Myocardial Infarction</b>                  |                                              |              |              |              |          |
| Yes                                           | 2.4                                          | 1.9          | 2.6          | 3.4          | 0.073    |
| No                                            | 97.6                                         | 98.1         | 97.4         | 96.6         |          |
| <b>Cigarette smoker</b>                       |                                              |              |              |              |          |
| Never                                         | 40.7                                         | 3.6          | 1.9          | 0.5          | <0.001   |
| Former                                        | 50.3                                         | 34.7         | 16.2         | 51.2         |          |
| Some day                                      | 2.0                                          | 11.4         | 14.2         | 19.9         |          |
| Every day                                     | 7.0                                          | 50.3         | 67.7         | 28.4         |          |
| <b>Demographics</b>                           |                                              |              |              |              |          |
| <b>Age in years, mean (±SD)</b>               | 48.6 (±17.9)                                 | 36.8 (±14.4) | 35.7 (±13.5) | 41.0 (±15.2) | <0.001   |
| <b>Body Mass Index (±SD) kg/m<sup>2</sup></b> | 28.1 (±7.5)                                  | 27.7 (±7.0)  | 27.7 (±7.0)  | 27.9 (±6.6)  | <0.001   |
| <b>Sex</b>                                    |                                              |              |              |              |          |
| Male                                          | 46.8                                         | 54.3         | 54.2         | 54.4         | <0.001   |
| Female                                        | 53.2                                         | 45.7         | 45.8         | 45.6         |          |
| <b>Poverty level/income</b>                   |                                              |              |              |              |          |
| Below poverty                                 | 22.9                                         | 33.1         | 27.4         | 35.1         | <0.001   |
| At or above poverty                           | 77.1                                         | 66.9         | 72.6         | 64.9         |          |
| <b>Race/ethnicity</b>                         |                                              |              |              |              |          |
| White                                         | 77.6                                         | 78.6         | 79.1         | 84.8         | <0.001   |
| Black                                         | 12.5                                         | 12.0         | 10.3         | 6.6          |          |
| Asian                                         | 5.9                                          | 3.6          | 3.1          | 2.7          |          |
| Other                                         | 3.9                                          | 5.7          | 7.5          | 5.9          |          |
| <b>Education</b>                              |                                              |              |              |              |          |
| Less than high school                         | 35.1                                         | 13.2         | 39.6         | 39.9         | <0.001   |
| High school or equivalent                     | 4.7                                          | 3.5          | 3.9          | 3.4          |          |
| Some college and associate                    | 29.5                                         | 37.8         | 41.8         | 42.9         |          |
| Bachelor and advanced degree                  | 30.8                                         | 15.5         | 14.7         | 13.7         |          |
| <b>Clinical status</b>                        |                                              |              |              |              |          |
| <b>High blood pressure</b>                    |                                              |              |              |              |          |
| Yes                                           | 29.2                                         | 21.1         | 22.6         | 23.1         | <0.001   |
| No                                            | 70.8                                         | 78.9         | 77.4         | 76.9         |          |
| <b>High cholesterol</b>                       |                                              |              |              |              |          |
| Yes                                           | 24.5                                         | 15.5         | 14.4         | 18.6         | <0.001   |
| No                                            | 75.5                                         | 84.5         | 85.6         | 81.4         |          |
| <b>Diabetes mellitus</b>                      |                                              |              |              |              |          |
| Yes                                           | 14.8                                         | 9.9          | 11.8         | 11.3         | <0.001   |
| No                                            | 85.2                                         | 90.1         | 88.2         | 88.7         |          |

\*Chi-square for counts, t-test for continuous variables.

Wave 1 data were collected from September 2013 to December 2014

**Table S2. Adjusted odds ratios for myocardial infarction (MI) at Wave 2, excluding respondents who had a MI at Wave 1.**

| <b>Variables</b>                  | <b>AOR (95% CI)</b> | <b>P-value</b> |
|-----------------------------------|---------------------|----------------|
| <b>E-cigarette user at wave 1</b> |                     |                |
| Never                             | Reference           |                |
| Former                            | 1.10 (0.56, 2.18)   | 0.775          |
| Some day                          | 2.12 (0.64, 7.08)   | 0.225          |
| Every day                         | -                   | -              |
| <b>Cigarette smoker at wave 1</b> |                     |                |
| Never                             | Reference           |                |
| Former                            | 3.40 (0.66, 17.50)  | 0.147          |
| Some day                          | 6.66 (1.30, 34.00)  | 0.025          |
| Every day                         | 3.05 (0.57, 16.49)  | 0.198          |
| <b>High blood pressure</b>        |                     |                |
| Yes                               | 1.74 (0.80, 3.79)   | 0.165          |
| <b>High cholesterol</b>           |                     |                |
| Yes                               | 0.82 (0.37, 1.85)   | 0.642          |
| <b>Diabetes mellitus</b>          |                     |                |
| Yes                               | 1.64 (0.56, 4.82)   | 0.372          |
| <b>Age</b>                        | 1.06 (1.03, 1.08)   | <0.001         |
| <b>Body Mass Index</b>            | 1.01 (0.99, 1.04)   | 0.289          |
| <b>Sex</b>                        |                     |                |
| Female                            | 0.47 (0.22, 1.03)   | 0.062          |
| <b>Poverty level/income</b>       |                     |                |
| At or above poverty               | 1.23 (0.54, 2.81)   | 0.616          |
| <b>Race/ethnicity</b>             |                     |                |
| White                             | Reference           |                |
| Black                             | 1.07 (0.50, 2.26)   | 0.870          |
| Asian                             | -                   | -              |
| Other                             | 1.46 (0.40, 5.37)   | 0.568          |
| <b>Education</b>                  |                     |                |
| Less than high school             | 2.20 (0.51, 9.53)   | 0.299          |
| High school or equivalent         | Reference           |                |
| Some college and associate        | 0.93 (0.43, 2.01)   | 0.864          |
| Bachelor and advanced degree      | 0.10 (0.02, 0.59)   | 0.012          |
| <b>Sample size</b>                | 25,820              |                |
| <b>VIF</b>                        | <1.2                |                |

Adjusted Odds Ratio adjusts for cigarette smoking (former, some day and every day), age, BMI, sex, poverty level, race/ethnicity, education, and clinical variables.

VIF: Variance Inflation Factor

**Table S3. Adjusted odds ratio for myocardial infarction at Wave 1 baseline including experimental e-cigarette users and smokers as some day users.**

| <b>Variables</b>             | <b>AOR (95% CI)</b> | <b>P-value</b> |
|------------------------------|---------------------|----------------|
| <b>E-cigarette user</b>      |                     |                |
| Never                        | Reference           |                |
| Former                       | 1.27 (0.95, 1.69)   | 0.113          |
| Some day                     | 1.62 (1.04, 2.54)   | 0.037          |
| Every day                    | 2.20 (1.20, 4.05)   | 0.013          |
| <b>Cigarette smoker</b>      |                     |                |
| Never                        | Reference           |                |
| Former                       | 1.47 (1.01, 2.14)   | 0.047          |
| Some day                     | 2.22 (1.37, 3.60)   | 0.002          |
| Every day                    | 2.94 (1.91, 4.51)   | <0.001         |
| <b>High blood pressure</b>   |                     |                |
| Yes                          | 2.09 (1.60, 2.72)   | <0.001         |
| <b>High cholesterol</b>      |                     |                |
| Yes                          | 3.10 (2.40, 3.99)   | <0.001         |
| <b>Diabetes mellitus</b>     |                     |                |
| Yes                          | 1.46 (1.09, 1.97)   | 0.013          |
| <b>Age in years</b>          | 1.07 (1.06, 1.08)   | <0.001         |
| <b>Body Mass Index</b>       | 1.02 (1.00, 1.03)   | 0.026          |
| <b>Sex</b>                   |                     |                |
| Female                       | 0.28 (0.20, 0.40)   | <0.001         |
| <b>Poverty level/income</b>  |                     |                |
| At or above poverty          | 0.73 (0.52, 1.02)   | 0.069          |
| <b>Race/ethnicity</b>        |                     |                |
| White                        | Reference           |                |
| Black                        | 0.83 (0.63, 1.09)   | 0.186          |
| Asian                        | 0.32 (0.08, 1.23)   | 0.101          |
| Other                        | 1.34 (0.84, 2.12)   | 0.217          |
| <b>Education</b>             |                     |                |
| Less than high school        | 1.52 (1.08, 2.14)   | 0.020          |
| High school or equivalent    | Reference           |                |
| Some college and associate   | 1.01 (0.77, 1.33)   | 0.923          |
| Bachelor and advanced degree | 0.64 (0.45, 0.89)   | 0.011          |
| <b>Sample size</b>           | 32,320              |                |
| <b>VIF</b>                   | <1.1                |                |

Adjusted Odds Ratio adjusts for cigarette smoking (former, some day and every day), age, BMI, sex, poverty level, race/ethnicity, education, and clinical variables.

VIF: Variance Inflation Factor

**Table S4. Adjusted odds ratios for current (every day or some day) e-cigarette use at Wave 2.\***

| Variables at Wave 1                                          | Among overall follow up sample |         | Among every day cigarette smoker at wave 1‡ |         | Among current cigarette smoker at wave 1‡ |         |
|--------------------------------------------------------------|--------------------------------|---------|---------------------------------------------|---------|-------------------------------------------|---------|
|                                                              | AOR (95% CI)                   | P-value | AOR (95% CI)                                | P-value | AOR (95% CI)                              | P-value |
| <b>MI</b>                                                    |                                |         |                                             |         |                                           |         |
| No                                                           | Reference                      |         | Reference                                   |         | Reference                                 |         |
| Yes                                                          | 1.45 (0.94, 2.25)              | 0.099   | 1.52 (0.90, 2.56)                           | 0.121   | 1.40 (0.86, 2.28)                         | 0.173   |
| <b>High blood pressure</b>                                   |                                |         |                                             |         |                                           |         |
| Yes                                                          | 1.32 (1.12, 1.55)              | 0.001   | 1.16 (0.96, 1.41)                           | 0.125   | 1.16 (0.97, 1.38)                         | 0.114   |
| <b>High cholesterol</b>                                      |                                |         |                                             |         |                                           |         |
| Yes                                                          | 0.91 (0.74, 1.12)              | 0.384   | 1.08 (0.83, 1.42)                           | 0.567   | 1.13 (0.89, 1.44)                         | 0.303   |
| <b>Diabetes mellitus</b>                                     |                                |         |                                             |         |                                           |         |
| Yes                                                          | 0.93 (0.72, 1.18)              | 0.543   | 1.03 (0.81, 1.32)                           | 0.789   | 1.05 (0.83, 1.31)                         | 0.697   |
| <b>Age</b>                                                   | 0.97 (0.96, 0.98)              | <0.001  | 0.97 (0.96, 0.97)                           | <0.001  | 0.97 (0.96, 0.98)                         | <0.001  |
| <b>Body Mass Index</b>                                       | 1.00 (0.99, 1.00)              | 0.359   | 1.00 (0.99, 1.01)                           | 0.806   | 1.00 (0.99, 1.01)                         | 0.981   |
| <b>Sex</b>                                                   |                                |         |                                             |         |                                           |         |
| Female                                                       | 0.83 (0.73, 0.94)              | 0.006   | 1.10 (0.91, 1.33)                           | 0.317   | 1.06 (0.90, 1.25)                         | 0.482   |
| <b>Poverty level/income</b>                                  |                                |         |                                             |         |                                           |         |
| At or above poverty                                          | 0.91 (0.78, 1.05)              | 0.202   | 1.29 (1.09, 1.53)                           | 0.004   | 1.19 (1.02, 1.39)                         | 0.032   |
| <b>Race/ethnicity</b>                                        |                                |         |                                             |         |                                           |         |
| White                                                        | Reference                      |         | Reference                                   |         | Reference                                 |         |
| Black                                                        | 0.38 (0.30, 0.48)              | <0.001  | 0.35 (0.24, 0.51)                           | <0.001  | 0.39 (0.27, 0.55)                         | <0.001  |
| Asian                                                        | 0.55 (0.39, 0.78)              | 0.001   | 0.69 (0.51, 1.52)                           | 0.363   | 0.69 (0.36, 1.33)                         | 0.279   |
| Other                                                        | 1.05 (0.84, 1.31)              | 0.659   | 1.07 (0.75, 1.51)                           | 0.721   | 1.12 (0.84, 1.49)                         | 0.451   |
| <b>Education</b>                                             |                                |         |                                             |         |                                           |         |
| Less than high school                                        | 0.89 (0.65, 1.21)              | 0.449   | 1.13 (0.77, 1.67)                           | 0.532   | 1.07 (0.75, 1.53)                         | 0.705   |
| High school or equivalent                                    | Reference                      |         | Reference                                   |         | Reference                                 |         |
| Some college and associate                                   | 1.06 (0.90, 1.24)              | 0.475   | 1.42 (1.18, 1.69)                           | <0.001  | 1.31 (1.09, 1.56)                         | 0.004   |
| Bachelor and advanced degree                                 | 0.38 (0.31, 0.47)              | <0.001  | 1.52 (1.08, 2.13)                           | 0.018   | 1.18 (0.90, 1.54)                         | 0.234   |
| <b>Number of new e-cigarette users between Waves 1 and 2</b> | 1,990                          |         | 776                                         |         | 946                                       |         |
| <b>Sample size</b>                                           | 26,447                         |         | 7,378                                       |         | 9,284                                     |         |
| <b>VIF</b>                                                   | <1.2                           |         | <1.1                                        |         | <1.1                                      |         |

\*Former e-cigarette users excluded from the analysis.

‡ Excluding e-cigarette users

Adjusted Odds Ratio adjusts for age, BMI, sex, poverty level, race/ethnicity, education, and clinical variables.

VIF: Variance Inflation Factor

**Table S5. Cross-sectional associations between conventional cigarette smoker and myocardial infarction at Wave 1 baseline among daily cigarette only users and daily dual users.**

| <b>Variables</b>                                      | <b>AOR (95% CI)</b> | <b>P-value</b> |
|-------------------------------------------------------|---------------------|----------------|
| <b>Cigarette smoker</b>                               |                     |                |
| Never cigarette and e-cigarette user                  | Reference           |                |
| Every day cigarette smoker and never e-cigarette user | 2.86 (1.70, 4.79)   | <0.001         |
| Every day cigarette and every day e-cigarette user    | 5.06 (1.99, 12.83)  | <0.001         |
| <b>High blood pressure</b>                            |                     |                |
| Yes                                                   | 1.80 (0.95, 3.42)   | 0.073          |
| <b>High cholesterol</b>                               |                     |                |
| Yes                                                   | 3.11 (2.03, 4.77)   | <0.001         |
| <b>Diabetes mellitus</b>                              |                     |                |
| Yes                                                   | 1.54 (0.93, 2.55)   | 0.095          |
| <b>Age in years</b>                                   | 1.06 (1.04, 1.08)   | <0.001         |
| <b>Body Mass Index</b>                                | 1.02 (0.99, 1.04)   | 0.260          |
| <b>Sex</b>                                            |                     |                |
| Female                                                | 0.24 (0.12, 0.50)   | <0.001         |
| <b>Poverty level/income</b>                           |                     |                |
| At or above poverty                                   | 0.80 (0.45, 1.43)   | 0.457          |
| <b>Race/ethnicity</b>                                 |                     |                |
| White                                                 | Reference           |                |
| Black                                                 | 0.81 (0.47, 1.41)   | 0.456          |
| Asian                                                 | 0.16 (0.02, 1.14)   | 0.071          |
| Other                                                 | 0.64 (0.24, 1.74)   | 0.387          |
| <b>Education</b>                                      |                     |                |
| Less than high school                                 | 0.83 (0.44, 1.55)   | 0.557          |
| High school or equivalent                             | Reference           |                |
| Some college and associate                            | 0.90 (0.51, 1.61)   | 0.734          |
| Bachelor and advanced degree                          | 0.45 (0.18, 1.09)   | 0.082          |
| <b>Sample size</b>                                    | 10,230              |                |
| <b>VIF</b>                                            | <1.6                |                |

VIF: Variance Inflation Factor

**Table S6. Adjusted odds ratios for myocardial infarction at Wave 1.**

| Variables                                | MI 2007 or later                                         |         | Entire sample                                              |         |
|------------------------------------------|----------------------------------------------------------|---------|------------------------------------------------------------|---------|
|                                          | AOR (95% CI)                                             | P-value | AOR (95% CI)                                               | P-value |
| <b>E-cigarette use</b>                   |                                                          |         |                                                            |         |
| Never                                    | Reference                                                |         | Reference                                                  |         |
| Former                                   | 1.27 (0.85, 1.88)                                        | 0.250   | 1.25 (0.93, 1.69)                                          | 0.147   |
| Some day                                 | 1.52 (0.43, 5.30)                                        | 0.515   | 1.99 (1.11, 3.58)                                          | 0.024   |
| Every day                                | 1.90 (0.69, 5.22)                                        | 0.216   | 2.25 (1.23, 4.11)                                          | 0.010   |
| <b>Cigarette use</b>                     |                                                          |         |                                                            |         |
| Never                                    | Reference                                                |         | Reference                                                  |         |
| Former                                   | 1.62 (0.97, 2.68)                                        | 0.066   | 1.48 (1.01, 2.15)                                          | 0.047   |
| Some day                                 | 2.34 (1.16, 4.75)                                        | 0.020   | 2.38 (1.40, 4.06)                                          | 0.002   |
| Every day                                | 3.22 (1.91, 5.42)                                        | <0.001  | 2.95 (1.91, 4.56)                                          | <0.001  |
| <b>High blood pressure</b>               |                                                          |         |                                                            |         |
| Yes                                      | 2.24 (1.35, 3.72)                                        | 0.002   | 2.08 (1.56, 2.77)                                          | <0.001  |
| <b>High cholesterol</b>                  |                                                          |         |                                                            |         |
| Yes                                      | 2.32 (1.54, 3.51)                                        | <0.001  | 3.01 (2.31, 3.92)                                          | <0.001  |
| <b>Diabetes mellitus</b>                 |                                                          |         |                                                            |         |
| Yes                                      | 1.24 (0.76, 2.03)                                        | 0.384   | 1.49 (1.09, 2.03)                                          | 0.013   |
| <b>Age in years</b>                      | 1.06 (1.04, 1.07)                                        | <0.001  | 1.07 (1.06, 1.08)                                          | <0.001  |
| <b>Body Mass Index</b>                   | 1.02 (1.01, 1.03)                                        | <0.001  | 1.02 (1.00, 1.03)                                          | 0.016   |
| <b>Sex</b>                               |                                                          |         |                                                            |         |
| Female                                   | 0.33 (0.21, 0.53)                                        | <0.001  | 0.27 (0.18, 0.39)                                          | <0.001  |
| <b>Poverty level/income</b>              |                                                          |         |                                                            |         |
| At or above poverty                      | 0.76 (0.45, 1.28)                                        | 0.307   | 0.72 (0.49, 1.04)                                          | 0.086   |
| <b>Race/ethnicity</b>                    |                                                          |         |                                                            |         |
| White                                    | Reference                                                |         | Reference                                                  |         |
| Black                                    | 1.03 (0.65, 1.64)                                        | 0.903   | 0.86 (0.63, 1.16)                                          | 0.324   |
| Asian                                    | 0.18 (0.03, 1.24)                                        | 0.086   | 0.31 (0.07, 1.38)                                          | 0.127   |
| Other                                    | 1.67 (0.78, 3.56)                                        | 0.189   | 1.37 (0.83, 2.25)                                          | 0.226   |
| <b>Education</b>                         |                                                          |         |                                                            |         |
| Less than high school                    | 1.63 (0.80, 3.33)                                        | 0.185   | 1.49 (1.05, 2.13)                                          | 0.030   |
| High school or equivalent                | Reference                                                |         | Reference                                                  |         |
| Some college and associate               | 1.21 (0.74, 1.95)                                        | 0.447   | 0.97 (0.72, 1.29)                                          | 0.814   |
| Bachelor and advanced degree             | 0.65 (0.37, 1.13)                                        | 0.131   | 0.62 (0.44, 0.87)                                          | 0.007   |
| <b>Sample size</b>                       | 31,815                                                   |         | 32,320                                                     |         |
| <b>Number of MI's (total)</b>            | 284                                                      |         | 699                                                        |         |
| <b>Number of MI's (among ecig users)</b> | Never =181<br>Former= 61<br>Some day =10<br>Every day =6 |         | Never =433<br>Former= 128<br>Some day =19<br>Every day =19 |         |
| <b>VIF</b>                               | <1.2                                                     |         | <1.1                                                       |         |

Adjusted Odds Ratio adjusts for cigarette smoking (former, some day and every day), age, body mass index, sex, poverty level, race/ethnicity, education, and clinical variables.

VIF: Variance Inflation Factor

**Figure S1. Flow diagram for sample.**

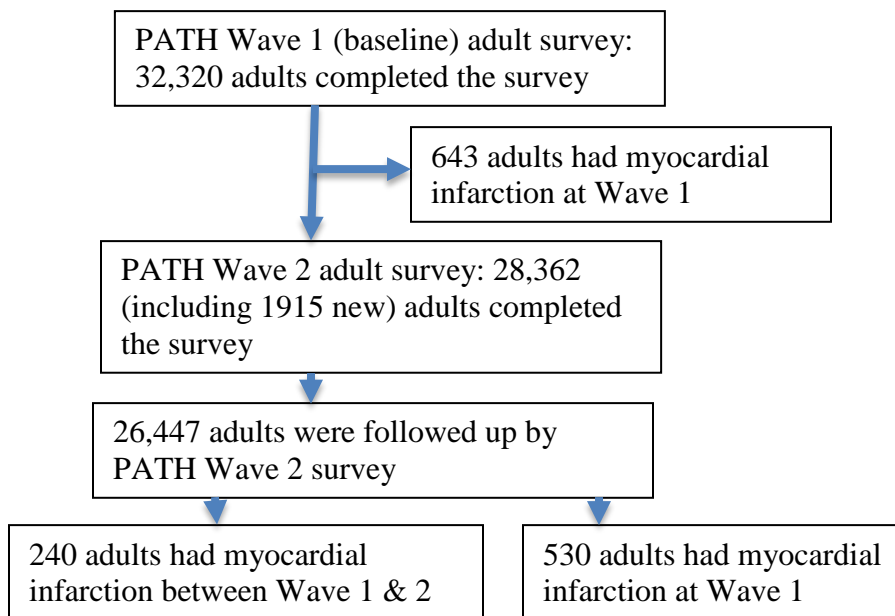

Supplement: JAH3-8-e012317-s001.pdf [file JAH3-8-e012317-s001.pdf]
